# Supplementary material for: Anthropogenic Disturbances Shape Soil Capillary and Saturated Water Retention Indirectly via Plant Functional Traits and Soil Organic Carbon in Temperate Forests
Source: MDPI journal article supplement (doi:10.3390/f12111588), 2021-11-18

**Anthropogenic disturbances shape soil capillary and saturated water retention  
indirectly via functional traits and soil organic carbon in temperate forests**

Shufang Liu<sup>1,2</sup>, Zuoqiang Yuan<sup>1</sup>, Arshad Ali<sup>3</sup>, Anvar Sanaei<sup>1</sup>, Zikun Mao<sup>1</sup>, Fan Ding<sup>4</sup>,  
Di Zheng<sup>1</sup>, Shuai Fang<sup>1</sup>, Zhaojie Jia<sup>4</sup>, Zhao Tao<sup>4</sup>, Fei Lin<sup>1</sup>, Ji Ye<sup>1</sup>, Xugao Wang<sup>1</sup>,  
Zhanqing Hao<sup>5\*</sup>

<sup>1</sup>CAS Key Laboratory of Forest Ecology and Management, Institute of Applied  
Ecology, Chinese Academy of Sciences, Shenyang 110164 China

<sup>2</sup>University of Chinese Academy of Sciences, Beijing 100049, China

<sup>3</sup>Forest Ecology Research Group, College of Life Sciences, Hebei University,  
Baoding, 071002, Hebei, China

<sup>4</sup>College of Land and Environment, Shenyang Agriculture University, Shenyang,  
China

<sup>5</sup>School of Ecology and Environment, Northwestern Polytechnical University, China

\*Corresponding author: Zhanqing Hao (hzq@iae.ac.cn)

**Table S1.** The descriptive summary of the studied sites and plots.

| Site                                     | Site size (ha)<br>(dimension,<br>m) | No. of<br>subplots | Latitude longitude | Elevation (m) <sup>a</sup> | Species<br>richness | DBH (cm) <sup>a</sup> | Dominant species                                                                  |
|------------------------------------------|-------------------------------------|--------------------|--------------------|----------------------------|---------------------|-----------------------|-----------------------------------------------------------------------------------|
| <b>Plots of low-disturbance level</b>    |                                     |                    |                    |                            |                     |                       |                                                                                   |
| <b>L1</b>                                | 1 (100*100)                         | 25                 | 127.98N; 42.35E    | 877.5<br>(875.1; 879.7)    | 25                  | 8.68<br>(1.0, 115.2)  | <i>Pinus koraiensis</i> , <i>Tilia amurensis</i> , <i>Acer pictum</i>             |
| <b>L2</b>                                | 1 (100*100)                         | 25                 | 126.23N; 43.18 E   | 727.5<br>(724.2; 731.1)    | 35                  | 8.98<br>(1.0, 152)    | <i>Pinus koraiensis</i> , <i>Acer pictum</i> , <i>Tilia amurensis</i>             |
| <b>L3</b>                                | 1 (100*100)                         | 25                 | 127.91N; 42.21E    | 1107.2<br>(1105.6; 1108.3) | 21                  | 8.64<br>(1.0, 96)     | <i>Larix gmelinii</i> , <i>Abies nephrolepis</i> , <i>Tilia amurensis</i>         |
| <b>Plots of medium-disturbance level</b> |                                     |                    |                    |                            |                     |                       |                                                                                   |
| <b>M1</b>                                | 1 (100*100)                         | 25                 | 127.86N; 42.48E    | 1010.9<br>(1016.3; 1023.1) | 34                  | 7.83<br>(1.0, 96.5)   | <i>Pinus koraiensis</i> , <i>Picea jezoensis</i> , <i>Acer pseudosieboldianum</i> |
| <b>M2</b>                                | 1 (100*100)                         | 25                 | 127.94N; 44.01E    | 721.6<br>(698.4; 743.7)    | 41                  | 8.98<br>(1.0, 75.0)   | <i>Acer pictum</i> , <i>Acer mandshuricum</i> , <i>Ulmus laciniata</i>            |
| <b>M3</b>                                | 0.8 (80*100)                        | 20                 | 124.79N; 40.91E    | 834.1<br>(817.0; 851.0)    | 40                  | 7.22<br>(1.0, 60.9)   | <i>Betula costata</i> , <i>Acer pseudosieboldianum</i> , <i>Acer pictum</i>       |
| <b>Plots of high-disturbance level</b>   |                                     |                    |                    |                            |                     |                       |                                                                                   |
| <b>H1</b>                                | 1 (100*100)                         | 25                 | 126.48N; 42.36E    | 758.6<br>(749.6; 764.8)    | 47                  | 3.4<br>(1.0, 75.0)    | <i>Pinus koraiensis</i> , <i>Juglans mandshurica</i> , <i>Acer pictum</i>         |
| <b>H2</b>                                | 1 (100*100)                         | 25                 | 128.17N; 42.19E    | 652.9<br>(640.4; 666.2)    | 45                  | 6.35<br>(1.0, 68.5)   | <i>Abies holophylla</i> , <i>Carpinus cordata</i> , <i>Ulmus laciniata</i>        |
| <b>H3</b>                                | 0.6 (60*100)                        | 15                 | 124.90N; 41.33E    | 892.2<br>(873.1; 909.4)    | 43                  | 7.15<br>(1.0, 53.8)   | <i>Prunus maackii</i> , <i>Tilia amurensis</i> , <i>Ulmus laciniata</i>           |

<sup>a</sup> Mean value and range (min, max) of each 20\*20m subplots. DBH, diameter at breast height. The dominant species are envaulted by the important value (the sum of the relative frequency, the relative density, and the relative dominance) of each species in each site.

**Table S2.** The descriptive statistical summary of soil functions and plant attributes

| Soil functions and plant attributes |                                            | Mean  | Min   | Max   | SE   |
|-------------------------------------|--------------------------------------------|-------|-------|-------|------|
| Water retention                     | WC (t hm <sup>-2</sup> )                   | 553   | 189   | 806   | 11   |
|                                     | WS (t hm <sup>-2</sup> )                   | 796   | 684   | 948   | 4    |
|                                     | SOC (g kg <sup>-1</sup> )                  | 147.9 | 16.4  | 416.8 | 7.1  |
| Soil texture                        | Clay (%)                                   | 34.2  | 6.9   | 83.1  | 1.2  |
|                                     | Silt (%)                                   | 34.0  | 9.4   | 43.8  | 0.7  |
|                                     | Finesand (%)                               | 28.4  | 3.5   | 69.2  | 1.1  |
|                                     | Sand (%)                                   | 3.3   | 0.0   | 15.8  | 0.2  |
| Plant diversity                     | S                                          | 15    | 7     | 29    | 0.4  |
|                                     | H                                          | 2.2   | 1.3   | 2.8   | 0.02 |
|                                     | FDis                                       | 2.3   | 1.5   | 4.2   | 0.04 |
| Functional trait composition        | CWM.SLA (cm <sup>2</sup> g <sup>-1</sup> ) | 234.7 | 113.0 | 522.5 | 6.9  |
|                                     | CWM.LA (cm <sup>2</sup> )                  | 45.9  | 8.1   | 216.3 | 3.2  |
|                                     | CWM.H (m)                                  | 25.0  | 13.8  | 35.3  | 0.3  |
|                                     | CWM.LPC (‰)                                | 1.7   | 1.4   | 2.0   | 0.01 |
|                                     | CWM.LNC (%)                                | 2.0   | 1.6   | 2.5   | 0.02 |

Abbreviations: soil capillary water retention (WC), soil saturated water retention (WS), soil organic carbon content (SOC), tree species richness (S), tree Shannon diversity (H), tree functional dispersion diversity (FDis), community weighted mean of specific leaf area (CWM.SLA), community weighted mean of leaf area (CWM.LA), community weighted mean of leaf phosphorus content (CWM.LPC), community weighted mean of leaf nitrogen content (CWM.LNC), community weighted mean of maximum tree height (CWM.H).

**Table S3.** Soil nutrient content among different disturbance levels and their difference based on one-way ANOVA analysis.

| Variable                          | Unit                | Disturbance Levels | Mean  | Max    | Min   | S.E. | Difference among disturbance levels ( $p<0.05$ ) |
|-----------------------------------|---------------------|--------------------|-------|--------|-------|------|--------------------------------------------------|
| Available soil nitrogen content   | mg kg <sup>-1</sup> | High               | 913.0 | 1262.1 | 495.4 | 22.2 | a                                                |
|                                   |                     | Medium             | 570.0 | 1568.7 | 165.1 | 32.3 | b                                                |
|                                   |                     | Low                | 430.0 | 908.2  | 148.6 | 20.4 | c                                                |
| Available soil phosphorus content | mg kg <sup>-1</sup> | High               | 11.7  | 41.5   | 0.2   | 1.4  | a                                                |
|                                   |                     | Medium             | 3.4   | 15.3   | 0.0   | 0.3  | b                                                |
|                                   |                     | Low                | 4.9   | 11.0   | 2.0   | 0.3  | b                                                |
| Soil pH                           | Unitless            | High               | 6.7   | 7.3    | 5.9   | 0.0  | ab                                               |
|                                   |                     | Medium             | 6.5   | 7.4    | 5.5   | 0.0  | b                                                |
|                                   |                     | Low                | 6.8   | 7.9    | 5.6   | 0.1  | a                                                |
| Soil organic carbon content       | g kg <sup>-1</sup>  | High               | 246.0 | 416.8  | 92.1  | 10.4 | a                                                |
|                                   |                     | Medium             | 132.0 | 294.7  | 34.8  | 7.3  | b                                                |
|                                   |                     | Low                | 86.9  | 245.5  | 16.4  | 4.6  | c                                                |
| Total soil carbon                 | %                   | High               | 15.4  | 27.5   | 5.3   | 0.7  | a                                                |
|                                   |                     | Medium             | 8.1   | 17.1   | 2.1   | 0.4  | b                                                |
|                                   |                     | Low                | 5.2   | 10.5   | 1.1   | 0.2  | c                                                |
| Total soil nitrogen               | %                   | High               | 1.01  | 1.60   | 0.40  | 1.01 | a                                                |
|                                   |                     | Medium             | 0.55  | 1.15   | 0.15  | 0.55 | b                                                |
|                                   |                     | Low                | 0.39  | 0.82   | 0.08  | 0.39 | c                                                |
| Total soil phosphorus             | ‰                   | High               | 0.12  | 0.17   | 0.06  | 0.12 | a                                                |
|                                   |                     | Medium             | 0.07  | 0.14   | 0.03  | 0.07 | c                                                |
|                                   |                     | Low                | 0.09  | 0.20   | 0.02  | 0.09 | b                                                |

**Table S4.** The standardized loadings of CWM.pca1 on functional traits based on principal component analysis.

| Variables                        | CWM.SLA | CWM.LA | CWM.LPC | CWM.LNC | CWM.H |
|----------------------------------|---------|--------|---------|---------|-------|
| Standardized loadings (CWM.pca1) | 0.96    | 0.82   | 0.75    | 0.93    | -0.86 |

**Figure S1.** Spearman's correlation relationship between soil water retention and community attributes. Red to blue color indicates negative to positive correlations, and the numbers inside the square represent correlation coefficient (r). Crosses inside the circles indicate insignificant ( $P > 0.05$ ) correlations.

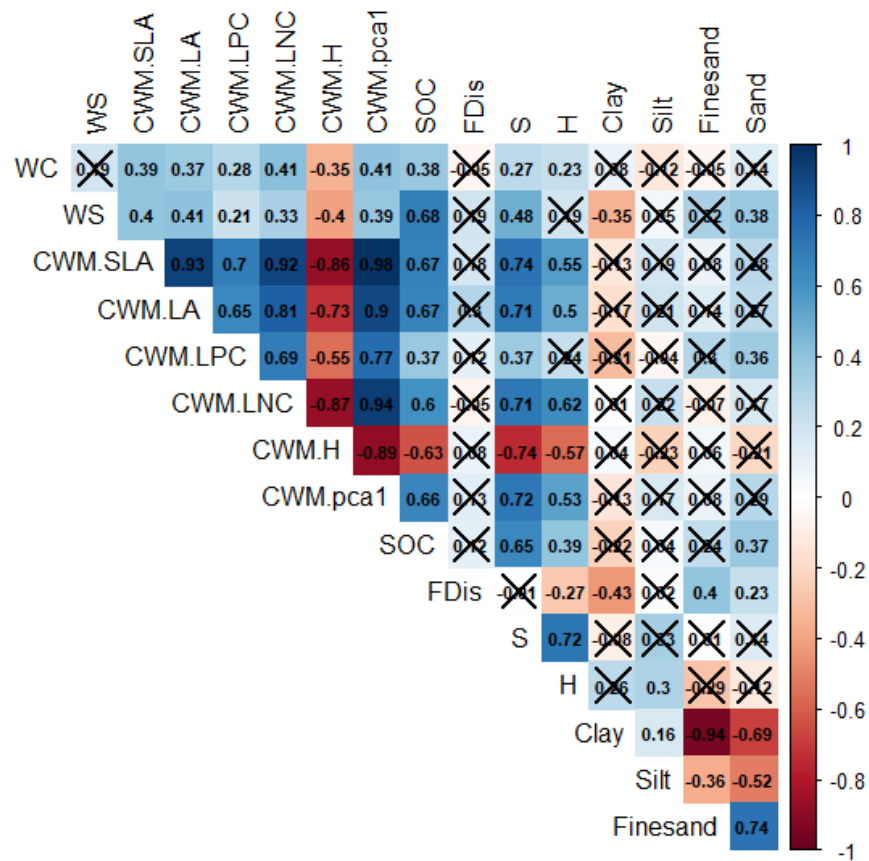

Supplement: s1 [file s1]
